# Supplementary material for: Impact of unhealthy lifestyle on cardiorespiratory fitness and heart rate recovery of medical science students
Source: Springer Nature journal article supplement (doi:10.1186/s12889-020-09154-x), 2020-06-26
Supplement: MOESM1 [file 18123294]

## ACTIVITY & LIFESTYLE QUESTIONNAIRE

*Tick the box or circle the right answer*

Age \_\_\_\_\_

Gender: Male  Female

Height \_\_\_\_\_ cm

Weight \_\_\_\_\_ kg

Ethnic origin: Asia  Africa  Caucasian (EU)  Other

Home country of residence \_\_\_\_\_

Any known medical conditions: Yes  if yes please specify \_\_\_\_\_  
No  \_\_\_\_\_

Do you drink alcohol? Yes  if yes, how many units per week? \_\_\_\_\_  
No  Calculation: strength (ABV) x volume (ml) ÷ 1,000 = units

Do you smoke currently? Yes  No  if yes, how many cigarettes per day \_\_\_\_\_

Favourite sport: \_\_\_\_\_

Favourite food: \_\_\_\_\_

Average sleep period: < 7 h/day  > 7 h/day

Weekend: Outdoor activity: <2hrs/day  2-4 hrs/day  >4hrs/day

Indoor screen time TV hrs/day? \_\_\_\_\_ Computer hrs/day? \_\_\_\_\_

Average exercise (or sport) hours per week: \_\_\_\_\_ hours

Using local gym facilities: Yes  No

Do you believe that you are physically fit: Yes  No

If doing less than 3 hours moderate exercise or activity per week, what is the main reason?

Don't want to  No time  No facility

others (please specify) \_\_\_\_\_
